# Supplementary material for: Seasonal and Interspecific Variation in Frugivory by a Mixed Resident-Migrant Overwintering Songbird Community
Source: MDPI journal article supplement (doi:10.3390/d13070314), 2021-07-09
Supplement: s1 [file s1]

## Supplementary Information

Table S1. Isotopic and elemental composition of diets items, or “endpoints”, used in the construction of mixing models to estimate the isotopic contribution of food sources to avian tissues. Values are presented as mean (standard deviation). See text for specifics of  $\delta^{15}\text{N}$  and  $\delta^{13}\text{C}$  for dietary endpoints.

| Dietary endpoint <sup>a</sup>     | n <sup>b</sup> | $\delta^{15}\text{N}$ (‰) | % N          | $\delta^{13}\text{C}$ (‰) | % C          | Significance Test <sup>c</sup> $\delta^{15}\text{N}$ | Significance Test <sup>c</sup> $\delta^{13}\text{C}$ |
|-----------------------------------|----------------|---------------------------|--------------|---------------------------|--------------|------------------------------------------------------|------------------------------------------------------|
| Fruits <sup>d</sup>               | 11/11          | -2.25 (2.00)              | 0.80 (0.14)  | -29.91 (1.23)             | 50.70 (1.48) | C                                                    | A                                                    |
| Fruits (Myricaceae)               | 5/5            | -2.25 (0.28)              | 0.85 (0.20)  | -30.02 (1.24)             | 56.08 (1.36) | C                                                    | A                                                    |
| Arthropods (high C <sub>3</sub> ) | 15/22          | 5.23 (1.30)               | 10.83 (2.33) | -26.02 (2.21)             | 48.16 (3.95) | A                                                    | B                                                    |
| Arthropods (low C <sub>3</sub> )  | 10/22          | 1.08 (0.95)               | 10.83 (2.33) | -26.02 (2.21)             | 48.16 (3.95) | B                                                    | B                                                    |
| Arthropods (high C <sub>4</sub> ) | 15/3           | 5.23 (1.30)               | 10.83 (2.33) | -14.90 (2.78)             | 48.16 (3.95) | A                                                    | C                                                    |
| Arthropods (low C <sub>4</sub> )  | 10/3           | 1.08 (0.95)               | 10.83 (2.33) | -14.90 (2.78)             | 48.16 (3.95) | B                                                    | C                                                    |
| Seeds (C <sub>3</sub> )           | 11/2           | 1.43 (1.99)               | 2.65 (1.25)  | -27.04 (0.45)             | 47.80 (2.02) | B                                                    | A,B                                                  |
| Seeds (C <sub>4</sub> )           | 11/9           | 1.43 (1.99)               | 2.65 (1.25)  | -12.71 (0.21)             | 47.80 (2.02) | B                                                    | C                                                    |

<sup>a</sup>The species composition of endpoints were: Fruits: *Morella cerifera* (n=5), *Cornus florida* (n=2), *Ilex opaca* (n=4); Fruits (Myricaceae): *Morella cerifera* (n=5); High trophic arthropods: Coleoptera (n=4), Diptera (n=2), Hemiptera (n=1), Hymenoptera (n=4), Aranae (n=4); Low trophic arthropods: Coleoptera (n=3), Hemiptera (n=4), Hymenoptera (n=1), Lepidoptera (n=2); C<sub>4</sub> arthropods : Hymenoptera (n=1), Coleoptera (n=1), Hemiptera (n=1); C<sub>3</sub> arthropods: the rest of the arthropods not included in C<sub>4</sub> arthropods; C<sub>3</sub> seeds: *Scirpus cyperinus* (n=2); C<sub>4</sub> seeds: *Andropogon* sp. (n=2), *Paspalum* sp (n=2), *Phragmites communis* (n=2), unidentified Poaceae (n=3)

<sup>b</sup>indicates sample size used to calculate  $\delta^{15}\text{N}/\delta^{13}\text{C}$ , respectively; %N and %C in fruits, arthropods, and seeds calculated from 11, 25, and 11 samples, respectively

<sup>c</sup>Comparing  $\delta^{15}\text{N}$  and  $\delta^{13}\text{C}$  between dietary end points. Letters differ at p < 0.001 (Scheffe’s adjusted)

<sup>d</sup>The fruit species included as dietary endpoints are those consumed frequently and by multiple species. Infrequently consumed fruit species that were not used as part of the fruit dietary endpoint include *Euonymus americanus*, *Toxicodendron radicans*, and *Phytolacca americana*.

Table S2. Tissue- and diet-specific discrimination ( $\Delta$ ) values used in mixing models for estimating the isotopic contribution of food sources to avian tissues. We estimated arthropod and fruit diet discrimination values using published equations relating diet-tissue discrimination values to the elemental concentration of the diet (Pearson et al. 2003). Values are presented as mean (standard deviation). See text for specifics of  $\Delta N$  and  $\Delta C$  calculation.

|                  | $\Delta N$ (%) |                |                | $\Delta C$ (%) |                |                 |
|------------------|----------------|----------------|----------------|----------------|----------------|-----------------|
|                  | Tissue         |                |                | Tissue         |                |                 |
|                  | Feather        | Blood          | Plasma         | Feather        | Blood          | Plasma          |
| Dietary endpoint |                |                |                |                |                |                 |
| Fruits           | -              | 1.15<br>(0.13) | 2.32<br>(0.23) | -              | 1.41<br>(0.56) | -0.07<br>(0.51) |
| Arthropods       | 3.77<br>(0.23) | 3.04<br>(0.56) | 3.20<br>(0.42) | 3.07<br>(0.83) | 0.64<br>(1.33) | -0.55<br>(0.98) |
| Seeds            | -              | 1.50<br>(0.38) | 2.48<br>(0.34) | -              | 0.54<br>(0.75) | -0.61<br>(0.62) |

Table S3. Sample sizes of various tissue samples collected for this study.

|                         |                     | Summer  | Fall   |       | Winter                  |       | # individuals contributing samples to: |                                  |
|-------------------------|---------------------|---------|--------|-------|-------------------------|-------|----------------------------------------|----------------------------------|
| Species                 | Total # individuals | feather | plasma | blood | plasma                  | blood | only one season                        | both seasons (i.e., paired data) |
| American Robin          | 7                   | 6       | -      | -     | 7                       | -     | 1                                      | 6                                |
| Eastern Towhee          | 12                  | 11      | 10     | -     | -                       | -     | 3                                      | 9                                |
| Eastern Tufted-titmouse | 12                  | 10      | 5      | -     | -                       | -     | 9                                      | 3                                |
| Gray Catbird            | 14                  | 12      | 10     | -     | -                       | -     | 5                                      | 9                                |
| Hermit Thrush           | 13                  | 10      | -      | -     | 11                      | -     | 5                                      | 8                                |
| Yellow-rumped Warbler   | 86                  | 83      | 9      | -     | 17 (1998),<br>12 (1999) | -     | 51                                     | 35                               |
| Northern Cardinal       | 22                  | 21      | 10     | -     | 11                      | -     | 2                                      | 20                               |
| Ruby-crowned Kinglet    | 18                  | 10      | -      | 13    | -                       | 5     | 8                                      | 10                               |
| Dark-eyed Junco         | 16                  | 14      | -      | -     | 12                      | -     | 6                                      | 10                               |
| Swainson's Thrush       | 8                   | 8       | -      | -     | 7                       | -     | 1                                      | 7                                |
| White-throated Sparrow  | 24                  | 23      | 5      | -     | 5                       | -     | 15                                     | 9                                |

Table S4. Estimated fruit composition of feces (%) and estimated isotopic contribution (%) of food sources to avian tissues based on linear mixing models. Median values are presented, along with the 95% frequentist confidence interval (fecal fruit) or Bayesian confidence intervals (mixing model output). First N value = isotopic contribution sample size and second N value = estimated percent of fruit in feces.

| Species                                           | N     | Fecal fruit  | Fruits       | Arthropods (total) | Seeds (total) | Arthropods (high – C <sub>3</sub> ) | Arthropods (low – C <sub>3</sub> ) | Arthropods (high – C <sub>4</sub> ) | Arthropods (low – C <sub>4</sub> ) | Seeds (C <sub>3</sub> ) | Seeds (C <sub>4</sub> ) |
|---------------------------------------------------|-------|--------------|--------------|--------------------|---------------|-------------------------------------|------------------------------------|-------------------------------------|------------------------------------|-------------------------|-------------------------|
| <b><i>Species Known to Consume Fruit</i></b>      |       |              |              |                    |               |                                     |                                    |                                     |                                    |                         |                         |
| <i>American Robin (Turdus migratorius)</i>        |       |              |              |                    |               |                                     |                                    |                                     |                                    |                         |                         |
| winter                                            | 7/7   | 96.5         | 31.0         | 69.0               | -             | 5.3                                 | 62.7                               | -                                   | -                                  | -                       | -                       |
|                                                   |       | (89.5, 100+) | (9.8, 49.8)  | (50.3, 90.2)       |               | (0.7, 14.5)                         | (44.9, 83.7)                       |                                     |                                    |                         |                         |
| <i>Gray Catbird (Dumetella carolinensis)</i>      |       |              |              |                    |               |                                     |                                    |                                     |                                    |                         |                         |
| fall                                              | 10/6  | 57.5         | 16.9         | 83.1               | -             | 41.3                                | 41.4                               |                                     |                                    |                         |                         |
|                                                   |       | (22.7, 92.3) | (2.9, 32.0)  | (68.0, 97.1)       |               | (29.8, 53.5)                        | (28.2, 55.3)                       |                                     |                                    |                         |                         |
| <i>Hermit Thrush (Catharus guttatus)</i>          |       |              |              |                    |               |                                     |                                    |                                     |                                    |                         |                         |
| winter                                            | 11/11 | 71.4         | 9.0          | 91.1               | -             | 29.4                                | 60.0                               | -                                   | -                                  | -                       | -                       |
|                                                   |       | (48.6, 94.1) | (0.9, 28.6)  | (71.4, 99.1)       |               | (16.3, 44.2)                        | (41.5, 71.7)                       |                                     |                                    |                         |                         |
| <i>Ruby-crowned Kinglet (Regulus calendula)</i>   |       |              |              |                    |               |                                     |                                    |                                     |                                    |                         |                         |
| fall                                              | 13/29 | 10.7         | 4.3          | 95.7               | -             | 34.3                                | 59.2                               | -                                   | -                                  | -                       | -                       |
|                                                   |       | (4.5, 16.8)  | (0.4, 20.2)  | (79.8, 99.6)       |               | (17.9, 50.8)                        | (41.1, 77.3)                       |                                     |                                    |                         |                         |
| winter                                            | 5/34  | 31.6         | 18.2         | 81.8               | -             | 33.9                                | 46.4                               | -                                   | -                                  | -                       | -                       |
|                                                   |       | (20.9, 42.4) | (2.4, 39.6)  | (60.4, 97.6)       |               | (18.4, 49.6)                        | (28.9, 65.9)                       |                                     |                                    |                         |                         |
| <i>Swainson's Thrush (Catharus ustulatus)</i>     |       |              |              |                    |               |                                     |                                    |                                     |                                    |                         |                         |
| fall                                              | 7/1   | -            | 20.5         | 79.5               | -             | 23.4                                | 55.2                               | -                                   | -                                  | -                       | -                       |
|                                                   |       |              | (3.3, 40.1)  | (59.9, 96.7)       |               | (11.4, 37.9)                        | (37.5, 73.7)                       |                                     |                                    |                         |                         |
| <i>Yellow-rumped Warbler (Dendroica coronata)</i> |       |              |              |                    |               |                                     |                                    |                                     |                                    |                         |                         |
| Fall                                              | 9/32  | 77.3         | 10.2         | 89.8               | -             | 64.5                                | 24.0                               | -                                   | -                                  | -                       | -                       |
|                                                   |       | (68.0, 86.6) | (1.2, 25.1)  | (74.9, 98.8)       |               | (48.2, 79.7)                        | (8.8, 42.1)                        |                                     |                                    |                         |                         |
| winter 1                                          | 17/34 | 72.5         | 36.8         | 63.2               | -             | 1.2                                 | 61.5                               | -                                   | -                                  | -                       | -                       |
|                                                   |       | (65.9, 79.1) | (24.2, 47.6) | (52.4, 75.8)       |               | 2(0.1, 5.2)                         | (51.1, 73.6)                       |                                     |                                    |                         |                         |

|                                                          |         |              |             |              |              |              |              |             |             |             |             |
|----------------------------------------------------------|---------|--------------|-------------|--------------|--------------|--------------|--------------|-------------|-------------|-------------|-------------|
| winter 2                                                 | 12/37   | 92.9         | 19.2        | 80.8         | -            | 28.5         | 52.0         | -           | -           | -           | -           |
|                                                          |         | (76.2, 100+) | (5.4, 32.3) | (67.7, 94.7) |              | (19.9, 38.7) | (39.8, 65.0) |             |             |             |             |
| <b><i>Species Known to Consume Fruit and Seeds</i></b>   |         |              |             |              |              |              |              |             |             |             |             |
| Eastern Towhee ( <i>Pipilo erythrophthalmus</i> )        |         |              |             |              |              |              |              |             |             |             |             |
| fall                                                     | 10/6    | 29.2         | 22.8        | 48.6         | 28.4         | 18.8         | 14.2         | 7.7         | 5.9         | 21.5        | 6.4         |
|                                                          |         | (0, 76.8)    | (7.1, 37.6) | (30.2, 66.4) | (10.9, 47.9) | (5.0, 31.8)  | (2.1, 28.8)  | (1.0, 17.9) | (0.7, 15.9) | (4.6, 40.1) | (0.7, 15.7) |
| Northern Cardinal ( <i>Cardinalis cardinalis</i> )       |         |              |             |              |              |              |              |             |             |             |             |
| fall                                                     | 10/10/5 | 34.0         | 25.8        | 45.8         | 27.5         | 5.7          | 24.5         | 3.4         | 8.2         | 20.5        | 6.0         |
|                                                          |         | (0, 91.9)    | (7.2, 45.8) | (23.5, 67.9) | (8.5, 45.9)  | (0.5, 20.9)  | (4.9, 47.3)  | (0.3, 11.7) | (0.9, 19.9) | (3.3, 42.7) | (0.7, 15.8) |
| winter                                                   | 11/4    | 48.8         | 16.0        | 51.1         | 32.3         | 3.7          | 20.9         | 3.8         | 20.9        | 14.1        | 17.8        |
|                                                          |         | (0, 100+)    | (2.3, 32.1) | (26.9, 74.1) | (13.2, 54.7) | (0.3, 17.1)  | (4.8, 38.5)  | (0.3, 17.2) | (4.8, 38.5) | (1.8, 30.9) | (3.4, 33.5) |
| Tufted Titmouse ( <i>Baeolophus bicolor</i> )            |         |              |             |              |              |              |              |             |             |             |             |
| fall                                                     | 5/11    | 50.3         | 12.9        | 55.7         | -            | 22.4         | 32.7         | -           | -           | 29.9        | -           |
|                                                          |         | (24.5, 76.1) | (1.4, 32.8) | (34.4, 77.1) |              | (6.6, 39.6)  | (14.3, 51.3) |             |             | (5.7, 54.7) |             |
| <b><i>Species Known to Consume Seeds</i></b>             |         |              |             |              |              |              |              |             |             |             |             |
| Dark-eyed Junco ( <i>Junco hyemalis</i> )                |         |              |             |              |              |              |              |             |             |             |             |
| winter                                                   | 12/12   | -            | -           | 58.2         | 41.8         | 3.3          | 20.9         | 4.0         | 25.6        | 17.6        | 24.5        |
|                                                          |         |              |             | (32.6, 81.6) | (18.4, 67.4) | (0.3, 15.1)  | (3.8, 37.9)  | (0.3, 19.0) | (7.5, 46.8) | (2.4, 35.2) | (6.3, 42.2) |
| White-throated Sparrow ( <i>Zonotrichia leucophrys</i> ) |         |              |             |              |              |              |              |             |             |             |             |
| fall                                                     | 5/11    | -            | -           | 67.6         | 32.4         | 19.2         | 20.6         | 12.7        | 14.2        | 20.1        | 11.9        |
|                                                          |         |              |             | (47.2, 87.7) | (12.3, 52.8) | (3.2, 34.1)  | (4.4, 36.2)  | (1.3, 28.2) | (1.7, 29.8) | (4.0, 35.1) | (1.3, 27.3) |
| winter                                                   | 5/0     | -            | -           | 64.4         | 35.6         | 10.4         | 20.5         | 10.0        | 20.1        | 18.7        | 17.2        |
|                                                          |         |              |             | (41.7, 85.8) | (14.3, 58.3) | (0.9, 27.2)  | (4.3, 37.1)  | (0.8, 27.2) | (3.7, 36.7) | (3.1, 34.5) | (2.7, 33.2) |
